# Supplementary material for: No change in the consumption of thyroid hormones after starting low dose naltrexone (LDN): a quasi-experimental before-after study
Source: PubMed Central journal article supplement (PMC7528597; doi:10.1186/s12902-020-00630-4), 2020-10-01
Supplement: 12902_2020_630_MOESM1_ESM.pdf [file 12902_2020_630_MOESM1_ESM.pdf]

### Additional file 1: ANCOVA analyses

One-Way ANCOVA analyzing differences between three groups (LDN group) with different low dose naltrexone (LDN) exposure. Controlling for sex, age in 2013 and number of all dispenses (Presc.) one year preceding index date.

- a) Average change in triiodothyronine (T3) dispensing one year before vs one year after the first LDN dispense.

| Source          | Type III Sum of Squares | df  | Mean Square | F     | Sig.  |
|-----------------|-------------------------|-----|-------------|-------|-------|
| Corrected Model | 1806.8                  | 5   | 361.4       | 0.567 | 0.726 |
| Intercept       | 22.2                    | 1   | 22.2        | 0.035 | 0.852 |
| Presc.          | 916.1                   | 1   | 916.1       | 1.436 | 0.231 |
| Age 2013        | 313.3                   | 1   | 313.3       | 0.491 | 0.484 |
| Sex             | 17.8                    | 1   | 17.8        | 0.028 | 0.867 |
| LDN group       | 677.1                   | 2   | 338.5       | 0.531 | 0.588 |
| Error           | 568982.1                | 892 | 637.9       |       |       |
| Total           | 571105.6                | 898 |             |       |       |
| Corrected Total | 570788.9                | 897 |             |       |       |

- b) Average change in levothyroxine (T4) dispensing one year before vs one year after the first LDN dispense.

| Source          | Type III Sum of Squares | df  | Mean Square | F     | Sig.  |
|-----------------|-------------------------|-----|-------------|-------|-------|
| Corrected Model | 86154.9 <sup>a</sup>    | 5   | 17231.0     | 1.207 | 0.304 |
| Intercept       | 20827.4                 | 1   | 20827.4     | 1.459 | 0.227 |
| Presc.          | 49780.4                 | 1   | 49780.4     | 3.488 | 0.062 |
| Age 2013        | 1534.2                  | 1   | 1534.2      | 0.108 | 0.743 |
| Sex             | 27469.9                 | 1   | 27469.9     | 1.925 | 0.166 |
| LDN group       | 7033.2                  | 2   | 3516.6      | 0.246 | 0.782 |
| Error           | 12729273.9              | 892 | 14270.5     |       |       |
| Total           | 12818607.3              | 898 |             |       |       |
| Corrected Total | 12815428.8              | 897 |             |       |       |
